# Supplementary material
Source: publisher site journal article supplement (https://www.dovepress.com/article/398594)
Supplement: Supplementary file 1 [file get_supplementary_file.php]

**Appendix 1: Documentation of chest drain insertion**

Audit period: 01/03/2017-31/08/2017 Patients: All in-patients given a chest drain

Hospital number: ____________ Date of birth: ___/___/_______

Age on admission: __________ years Gender: M / F

Co-morbidities:

Respiratory ________________________________________________________________

Non-respiratory ____________________________________________________________

Indication for chest drain: _____________________________________________________

Department where procedure was done: _________________________________________

Drain inserted out of hours? (between 6pm and 8am, over weekend) Yes / No / No data

Was the patient moved to ward 10 / HDU? Yes / No

Grade of doctor performing procedure: __________________________________________

Speciality of doctor performing procedure: _______________________________________

Type of chest tube Seldinger / surgical / no data

Size of Chest tube __________/ no data

Site of insertion (lateral/anterior/posterior/no data): _________________________________

Skin suture used? Yes / No / No data

Any immediate complications recorded? _________________________________________

_________________________________________________________________________

Did chest tube fall out? Yes / No

If yes, after how long? ­_______ days

Did chest tube move from initial position? Yes / No / No data

If yes, how long after insertion? _______ days

Did the patient develop surgical emphysema? Yes / No

Did the patient require re-insertion of chest tube? Yes / No

Length of hospital stay: ________ days

**Appendix 2: Chest Drain Checklist**

***Please file in patient’s notes
after completing***

Date: Time: Location: ____________________

Done by: Level:

Supervised by:

**Pre-procedure:**

1. Written consent obtained or Emergency procedure

1. Coagulation checked Anticoagulants held INR< 1.5 Platelets >50,000
2. Radiology reviewed
3. Indication:

i) Parapneumonic effusion ii) Suspected empyema iii) Post trauma iv) Pneumothorax v) Pleurodesis vi) Malignant effusion

vii) Other indication _________________________________

**Ultrasound Findings (Fluid Only):**

**Procedure:**

1. U/S guidance Site marked
2. Local anaesthetic used Type: Amount (ml): _______
3. Pleural Aspiration only
   Seldinger or Large bore (surgical)
4. Drain size Drain Site _________________ Sutured

5. Connected to underwater seal (if chest drain)

6. Wound dressed

7. All connections (three-way tap, drainage tube, etc.) secured (if chest drain)

8. Immediate complications: no yes _______________________________

9. Guidewire used: no yes

10. Guidewire removal witnessed by: __________________________________

11. Number of Attempts: ______ 11a. Successful: yes no
12. Tolerance: good with difficulty poor

**Fluid characteristics:**

**Post-procedure:**

1. Chest x-ray

2. Timed drainage ______ ml every ____ hrs (if applicable) or N/A

3. Fluid sent for i) C&S ii) AFB iii) Protein iv) LDH v) Cytology

vi) Amylase vii) Glucose viii) Other ____________________________

4. Any other instructions ______________________________________________

Signed:

Name and bleep:

Please ensure that a chest drain care plan has been started if applicable.

**Review of CXR:**

Reviewed by: _____________________________

Time and date: ____________________________

Drain placement satisfactory: yes no

Complications (if any):

Signed:

Name and bleep:

Edition: 2
Last Edited: January 2020

**Notes:** Data from British Thoracic Society Pleural Disease Guidelines - 2010 update. Nick Maskell on behalf of the British Thoracic Society Pleural Disease Guideline Group. <http://dx.doi.org/10.1136/thx.2010.140236>
